# Supplementary material
Source: PubMed Central journal article supplement (PMC3234785)

## **MATERIAL AND METHODS**

### *Investigation of subcellular localization*

HEK293 cells for imaging were cultured on glass coverslips, which were treated with 0.01 mg/ml poly-L-Lysine (BIOCHROM AG, Berlin Germany). For the studies shown here we used YFP- fused GPCR constructs. Cells were overlaid with HEPES-buffered solution (138 nM NaCl, 6 mM KCl, 1 mM MgCl<sub>2</sub>, 1 mM CaCl<sub>2</sub>, 5.5 mM glucose, 2 mg/ml bovine serum albumin, and 10 mM HEPES, pH 7.5) and imaged using a confocal laser-scanning-microscope (LSM 510 META, Carl Zeiss, Jena) with a Plan-Fluar 100x/1.45-object. Microscopy pictures were generated using a 458 nm and a 488 nm laser for excitation and an LP505 emission filter.

### *Determination of Fluorescence resonance energy transfer*

Based on fluorescence resonance energy transfer (FRET) we studied the interaction of MC3R and GHSR as previously described (1,2). Furthermore, we tested homo- and heterodimerization of mutants MC3R I183N, GHSR A204E and GHSR F279L. Therefore, energy transfer-competent forms of auto-fluorescent proteins (cyan-fluorescence protein, CFP and yellow-fluorescence protein, YFP) were attached to the C-terminal tails of the GPCRs. Briefly, 24 h after co-transfection of HEK293 cells with differentially epitope-tagged GPCRs, YFP was photo-bleached at 512 nm and the increase of CFP-emission was measured at excitation at 410 nm. FRET efficiency was calculated as follows:  $E = (F_{\text{CFP-max}} - F_{\text{CFP-min}}) / F_{\text{CFP-max}}$  (3). Cells with a molar ratio (YFP:CFP) of less than 1 and over 4 or exhibiting unacceptable signal-to-noise ratios (linear regression analysis giving R<sup>2</sup>-values < 0,6) were omitted. The formation of stable dimers is arranged by FRET efficiency between 8 – 25 %.

## **REFERENCES**

1. Rediger, A., Tarnow, P., Bickenbach, A., Schaefer, M., Krude, H., Gruters, A., and Biebermann, H. (2009) *Obes Facts* **2**, 80-86
2. Tarnow, P., Rediger, A., Brumm, H., Ambrugger, P., Rettenbacher, E., Widhalm, K., Hinney, A., Kleinau, G., Schaefer, M., Hebebrand, J., Krause, G., Gruters, A., and Biebermann, H. (2008) *Obes Facts* **1**, 155-162
3. Amiri, H., Schultz, G., and Schaefer, M. (2003) *Cell Calcium* **33**, 463-470

## FIGURE LEGENDS

### **Supplementary figure S1: Investigation of dimerization and ligand binding of the MC3R mutant I183N**

HEK293 cells were co-transfected with plasmids encoding MC3R-YFP and MC3R-CFP, MC3R I183N-CFP or GHSR-CFP. As positive control the homodimer of MC3R and the MC3R/GHSR heterodimer was used. By FRET analysis we examined the ability of MC3R mutant I183N to form dimers with MC3R (**A**) and with GHSR (**B**). FRET efficiencies (E) were calculated from the relative increase in CFP emission and the decrease in YFP emission during selective photobleaching at 512 nm. The depicted data represent means  $\pm$  SEM of 4–6 single cells of one representative measurement of at least three independent transfection experiments performed in triplicates. (**C**) Compared to wild-type MC3R the mutant I183N is still able to bind the ligand but with decreased affinity

### **Supplementary figure S2: Signaling properties of natural GHSR mutants**

Significant changes of basal and ligand induced activity of GHSR was detected for the mutants A204 and F279L. Twenty-four hours after transfection of HEK293 cells with GHSR mutants and NFAT-luciferase reporter gene constructs activity was quantified in absence or in presence of 1  $\mu$ M ghrelin. Data represent the mean  $\pm$  S.E.M. from one representative experiment performed in n=6 out of six independent experiments (see also table 1). Analysis of variance followed by one way ANOVA and Turkey tests. Basal activity of wild-type GHSR compared to the mutants \* $p > 0.05$ , ligand-induced activity of GHSR wild-type versus mutants \*\* $p < 0.001$ .

### **Supplementary figure S3: Investigation of dimerization and intracellular localization of GHSR mutants A204E and F279L**

HEK293 cells were co-transfected with plasmids encoding MC3R-YFP and GHSR-CFP, GHSR A204E-CFP or GHSR F279L-CFP. As positive control the homodimer of GHSR and the MC3R/GHSR heterodimer were used. By FRET analysis we examined the competence of GHSR mutants A204E and F279L to form dimers with wt GHSR (**A**) as well as with MC3R (**B**). FRET efficiencies were calculated from the relative increase in CFP emission and the decrease in YFP emission during selective photobleaching at 512 nm. The depicted data represent means  $\pm$  SEM of 4-6 single cells of one representative measurement of at least three independent transfection experiments performed in triplicates. (**C**) Fluorophore-tagged GHSR mutants A204E and F279L were used to prove intracellular localization in HEK 293 cells by confocal laser-scanning-microscopy.

Supplementary figure S1

**A**

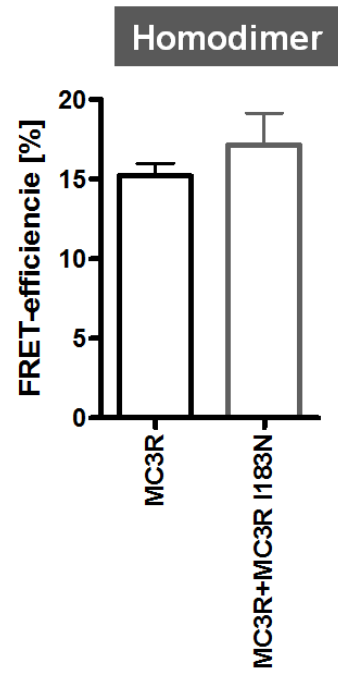

**B**

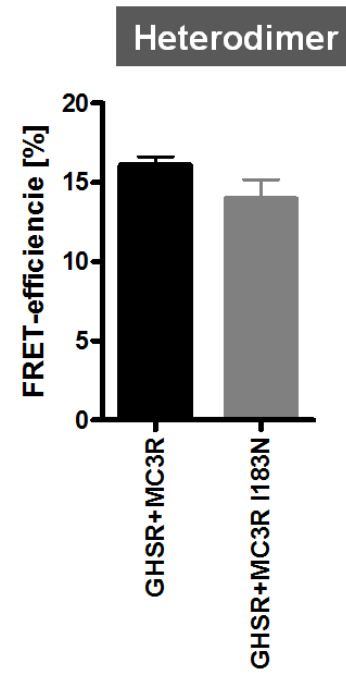

**C**

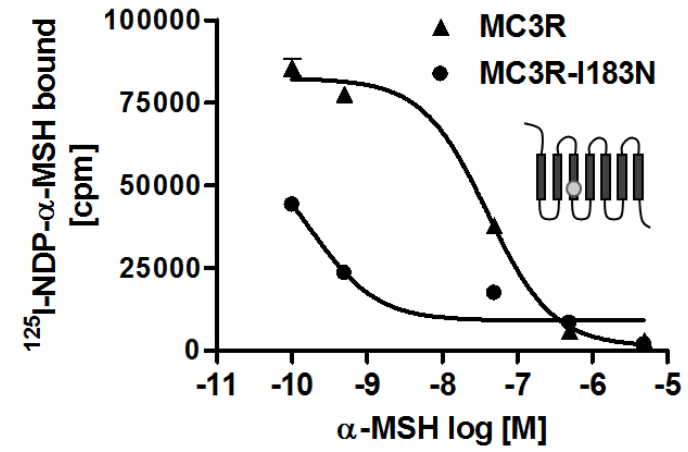

Supplementary figure S2

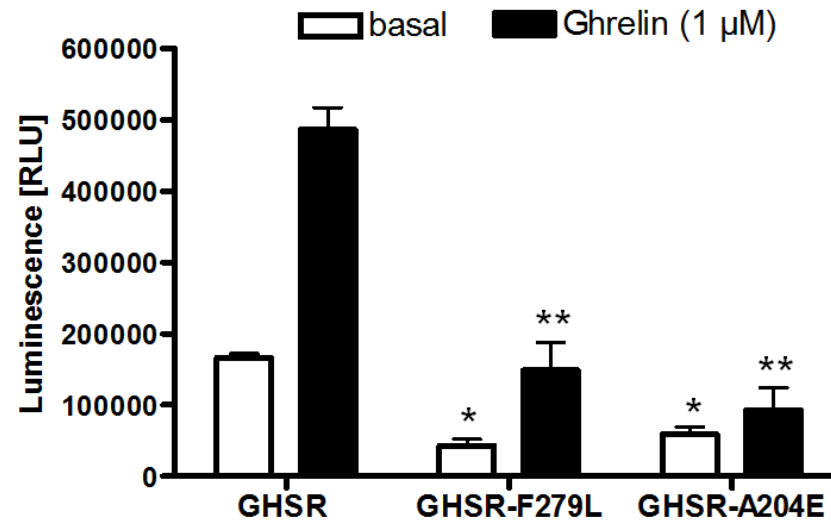

Supplementary figure S3

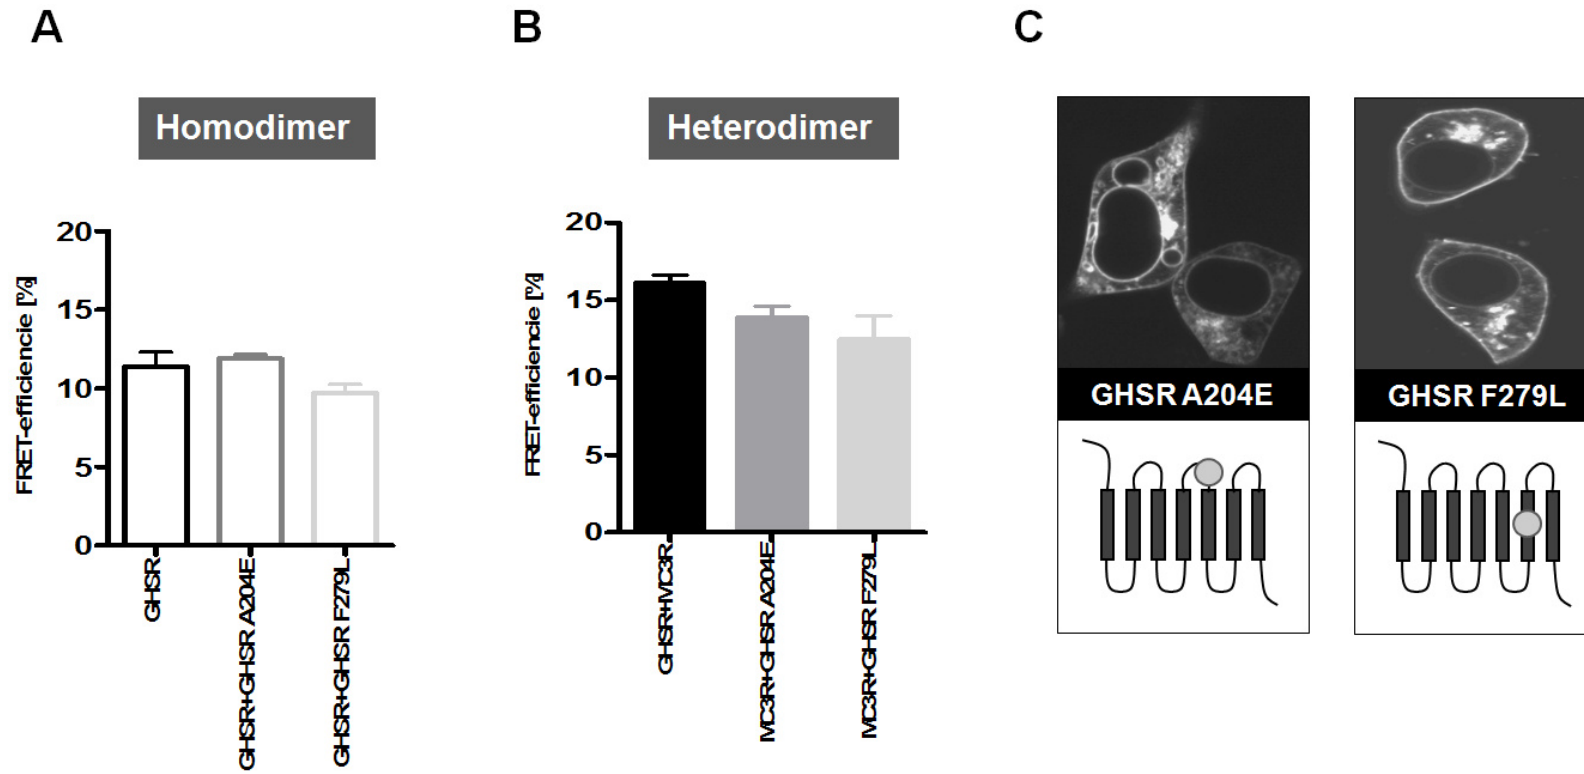

Supplement: supp_M111.287607_jbc.M111.287607-1.pdf [file supp_M111.287607_jbc.M111.287607-1.pdf]
